# Supplementary material for: Perception of Emotional Facial Expressions in Amyotrophic Lateral Sclerosis (ALS) at Behavioural and Brain Metabolic Level
Source: PubMed Central journal article supplement (PMC5065224; doi:10.1371/journal.pone.0164655), 2016-10-14
Supplement: pone.0164655.s001.pdf [file pone.0164655.s001.pdf]

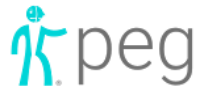

Paul Ekman Group, LLC.

PO Box 26089  
San Francisco, CA, 94126-6089  
EIN: 20-1170753

**Invoice #: 2850**

**Date: August 2, 2016**

Bill To/Contact:

PD Dr. Dorothee Lulé,  
University of Ulm, RKU,  
Department of Neurology  
Oberer Eselsberg 45  
89081 Ulm  
Germany

Phone: 0049 (0) 731 177 5267

[dorothee.lule@uni-ulm.de](mailto:dorothee.lule@uni-ulm.de)

Publisher: PLOS ONE  
Book/publication title: PLOS ONE  
Article title: Perception of emotional facial expressions in amyotrophic lateral sclerosis (ALS) at behavioural and brain metabolic level  
Book/article/publication author(s): Aho-Özhan, Keller, Heimrath, Uttner, Kassubek, Birbaumer, Ludolph, Lulé  
First edition or reprint: first edition  
Anticipated publication date: 22.08.2016  
Anticipated print run/number of copies: 10  
Format (print and/or electronic): electronic

| Quantity     | Item Code | Description               | Cost         |
|--------------|-----------|---------------------------|--------------|
| 1            | POFA      | Pictures of Facial Affect | \$175        |
|              |           |                           |              |
|              |           |                           |              |
|              |           |                           |              |
|              |           |                           |              |
|              |           |                           |              |
|              |           |                           |              |
| <b>Total</b> |           |                           | <b>\$175</b> |

**Preferred - Pay By Credit Card:**

Contact us at [custserv@paulekman.com](mailto:custserv@paulekman.com) to get instructions for paying on our secure website: [www.paulekman.com](http://www.paulekman.com)

**Pay by Check:**

- Payable to Paul Ekman Group
- Please ensure that our invoice number is on the check or stub
- PO Box Address, ATTN: Permissions Dept.

THIS INVOICE ENTITLES THE ABOVE PERSON/ORGANIZATION PERMISSION TO USE THE IMAGE(S) IN THE PUBLICATION AS STATED ABOVE FOR THE STATED EDITION ONLY. SUBSEQUENT EDITIONS REQUIRE ADDITIONAL PERMISSION/INVOICING. ALL RIGHTS GRANTED ARE NON-EXCLUSIVE. PAYER AGREES TO ENSURE PROPER ACCREDITATION TO: PAUL EKMAN, PH.D./ PAUL EKMAN GROUP, LLC. PLEASE CONTACT US AT [CUSTSERV@PAULEKMAN.COM](mailto:custserv@paulekman.com) FOR FURTHER DETAILS.
